# Supplementary material
Source: publisher figshare collection journal article supplement (https://karger.figshare.com/ndownloader/files/27820116)
Supplement: Supplementary file 1 [file 27820116]

**SUPPLEMENTARY FIGURES**

Supplemental Fig. 1. Ophthalmologic examination of the unaffected eye before and 1 and 3 months after treatment. Fundus photograph (A, F, K), fundus autofluorescence (B, G, L), and optical coherence tomographic image (C, H, M) show no particular abnormality. The multifocal electroretinogram (mfERG) (D, I, M) shows well-preserved central retinal responses. Full-field ERG (ffERG) (E, J, O) shows a relatively attenuated b-wave, which was better as compared to that seen in relation to the affected eye.

Supplemental Fig. 2. Goldmann perimetry and mfERG showing trace array in both eyes before (A, B), 1 month after treatment (C, D) and 2 months after treatment (E, F). Goldmann perimetry (A, C and E) shows paracentral scotoma in the affected eye. The trace array of mfERG in the affected eye corresponding to the 3D plots shown in Fig. 2 (I, N, S, respectively) shows recovery of the central retinal function in the course of the treatment and that in the contralateral eye shows good central responses throughout the follow up period (B, D and F).
